# Supplementary material for: Can Intelligence Affect Alcohol-, Smoking-, and Physical Activity-Related Behaviors? A Mendelian Randomization Study
Source: MDPI journal article supplement (doi:10.3390/jintelligence11020029), 2023-01-31
Supplement: s1 [file s1]

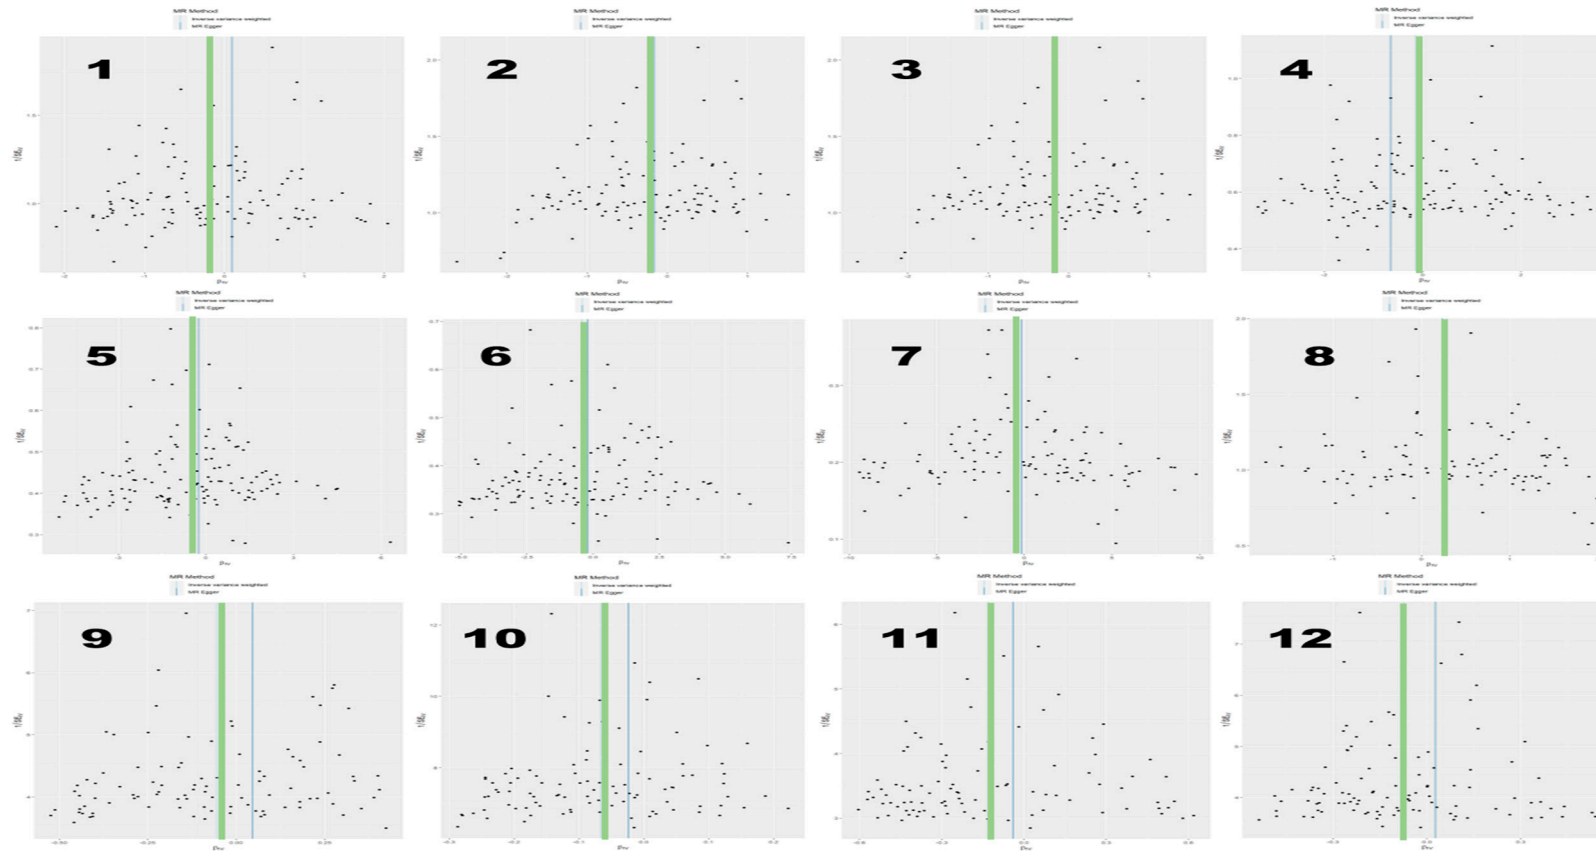

**Figure S1.** Funnel plots

Note: number 1 to 12 respectively represents alcohol use disorder, mental and behavioral disorders due to alcohol, alcohol dependence, alcohol abuse, smoking, smoking dependence, smoking quantity, smoking cessation, walking frequency, walking duration, moderate pa frequency, and vigorous pa frequency. Green lines indicate the IVW estimation.

**Table S1.** The Steiger test and sensitivity analysis.

| Outcome                                         | Correct-causality          | Sensitivity Ratio | Reliability of the test |
|-------------------------------------------------|----------------------------|-------------------|-------------------------|
|                                                 | Adjusted for measure error | R                 |                         |
| Alcohol use disorder                            | T                          | 1.221             | Yes                     |
| Mental and behavioural disorders due to alcohol | F                          | 1.154             | Yes                     |
| Alcohol dependence                              | F                          | 1.493             | Yes                     |
| Alcohol abuse                                   | F                          | 3.783             | Yes                     |
| Smoking                                         | F                          | 15.407            | Yes                     |
| Smoking dependence                              | F                          | 33.912            | Yes                     |
| Smoking quantity (Cigarettes smoked per day)    | F                          | -6683.658         | No                      |
| Smoking cessation (Former vs current smoker)    | T                          | 1.221             | Yes                     |
| Walking frequency                               | T                          | 12.678            | Yes                     |
| Walking duration                                | T                          | 33.664            | Yes                     |
| Moderate PA frequency                           | T                          | 8.895             | Yes                     |
| Vigorous PA frequency                           | T                          | 15.189            | Yes                     |

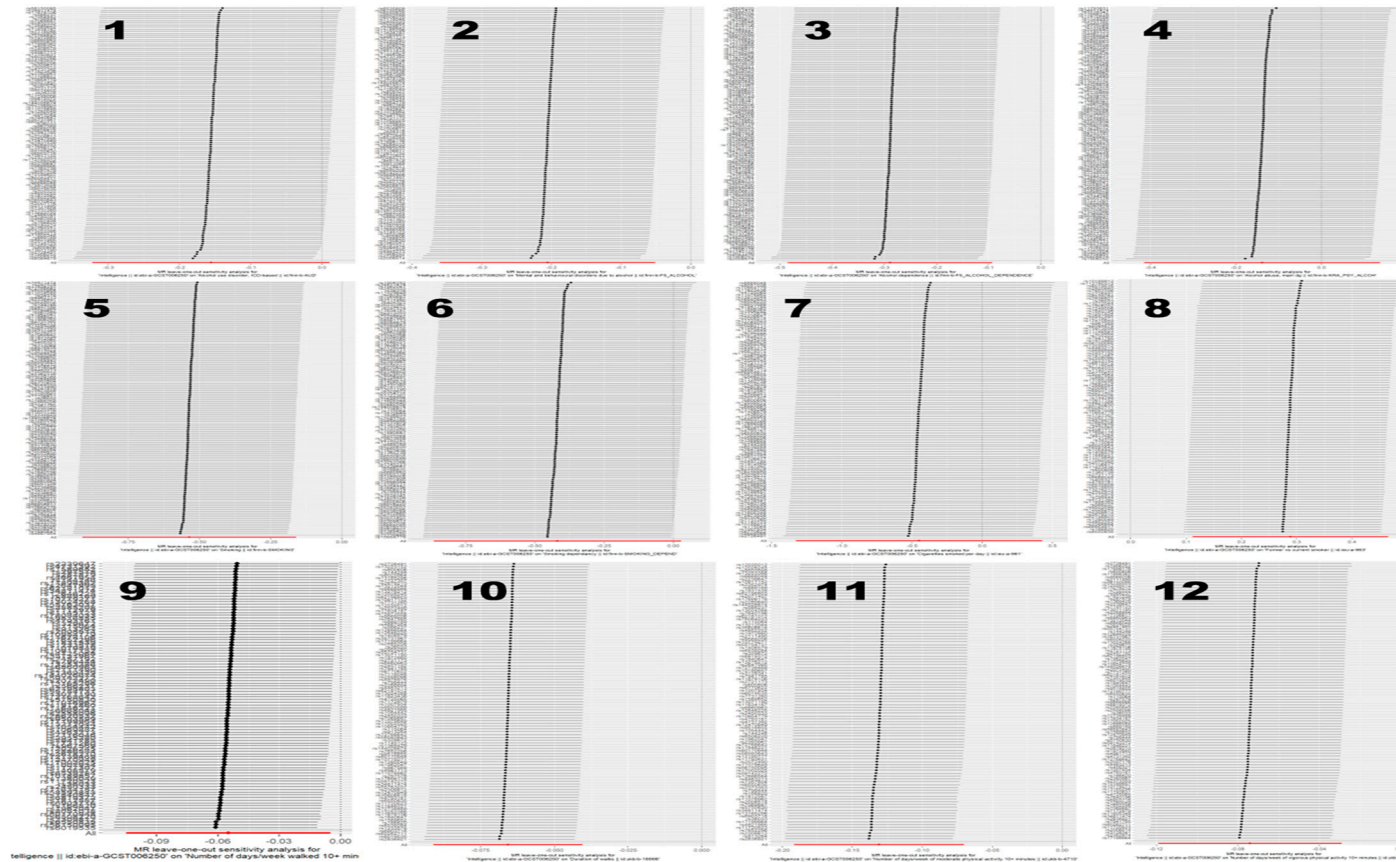

**Figure S2.** LOO plots.

**Note:** number 1 to 12 respectively represents alcohol use disorder, mental and behavioral disorders due to alcohol, alcohol dependence, alcohol abuse, smoking, smoking dependence, smoking quantity, smoking cessation, walking frequency, walking duration, moderate pa frequency, and vigorous pa frequency.

**Table S2.** The Cochran's Q test

| Outcome                                         | Cochran's Q | <i>p</i> |
|-------------------------------------------------|-------------|----------|
| Alcohol use disorder                            | 111.183     | 0.659    |
| Mental and behavioural disorders due to alcohol | 98.211      | 0.838    |
| Alcohol dependence                              | 111.991     | 0.857    |
| Alcohol abuse                                   | 14.653      | 0.776    |
| Smoking                                         | 104.498     | 0.972    |
| Smoking dependence                              | 109.002     | 0.887    |
| Smoking quantity (Cigarettes smoked per day)    | 82.839      | 0.960    |
| Smoking cessation (Former vs current smoker)    | 87.153      | 0.817    |
| Walking frequency                               | 114.743     | 0.093    |
| Walking duration                                | 81.178      | 0.904    |
| Moderate PA frequency                           | 117.369     | 0.060    |
| Vigorous PA frequency                           | 102.998     | 0.389    |
